# Supplementary material for: Assessment of C-phycocyanin effect on astrocytes-mediated neuroprotection against oxidative brain injury using 2D and 3D astrocyte tissue model
Source: PubMed Central journal article supplement (PMC4585836; doi:10.1038/srep14418), 2015-09-24
Supplement: srep14418-s1.pdf [file srep14418-s1.pdf]

**Assessment of C-phycoyanin effect on astrocytes-mediated  
neuroprotection against oxidative brain injury using 2D and 3D astrocyte  
tissue model**

**Supplementary Information**

**Seul Ki Min<sup>1</sup>, Jun Sang Park<sup>1</sup>, Lidan Luo<sup>2</sup>, Yeo Seon Kwon<sup>1</sup>, Hoo Cheol Lee<sup>1</sup>, Hyun Jung Shim<sup>1</sup>,  
Il-Doo Kim<sup>2</sup>, Ja-Kyeong Lee<sup>2</sup>, Hwa Sung Shin<sup>1,\*</sup>**

<sup>1</sup> Department of Biological Engineering, Inha University, Incheon, 402-751, Korea.

<sup>2</sup> Department of Anatomy, Inha University School of Medicine, Incheon, 400-712, Korea.

**\* Corresponding author**

**Hwa Sung Shin, [hsshin@inha.ac.kr](mailto:hsshin@inha.ac.kr), Tel: +82-32-860-9221, Fax: +82-32-872-4046**

**This file includes :**

2 tables and 4 figures which are supporting our research.

| <b>Gene</b>                     | <b>Forward (5'→3')</b>  | <b>Reverse (5'→3')</b>  |
|---------------------------------|-------------------------|-------------------------|
| <b>MnSOD</b>                    | CGGGTTTCTGAGTGAGGTCAG   | GTCAGGGAAAGGGTGTCCCTTC  |
| <b>CuZnSOD</b>                  | TCACTTCGAGCAGAAGGCAA    | TGAGGTCCTGCAGTGGTACA    |
| <b>EcSOD</b>                    | GAGAGCTTGTGAGGTGTGGAA   | CGGACTCTCCGGTATCTGAC    |
| <b>Catalase</b>                 | GGCACAAGCCTCACCAGTAA    | CCCTCGGGAAATGCCATCAA    |
| <b>BDNF</b>                     | GACTCTGGAGAGCGTGAA      | CCACTCGCTAATACTGTCAC    |
| <b>NGF</b>                      | CTGGACTAAACTTCAGCATTTC  | TGTTGTTAATGTTACCTCGC    |
| <b>TNF-<math>\alpha</math></b>  | GCTTGGTGGTTTGCTACGAC    | ATGGGCTCCCTCTCATCAGT    |
| <b>IL-6</b>                     | CCTATTGAAAATCTGCTCTG    | TTGGGGTAGGAAGGACTATT    |
| <b>IL-1<math>\beta</math></b>   | AAATGCCTCGTGCTGTCTGA    | AGGCCACAGGGATTTTGTCTG   |
| <b>Neurocan</b>                 | TTTCAGTCCACAGCGATCAG    | AGGAGAGGGATACAGCAGCA    |
| <b>Phosphacan</b>               | TTGACAAGTGATGAAGAGAGTGG | AATCAGCACATCTCGTTCTATCC |
| <b><math>\beta</math>-actin</b> | CCGCGAGTACAACCTTCTTG    | CATGCCGGAGCCGTTGTC      |

**Table S1.** mRNA sequences that were designed for the analysis of neuroprotective function of C-Pc treated astrocytes.

|                         | Control group |                | MCAO group  |                |
|-------------------------|---------------|----------------|-------------|----------------|
|                         | Base          | C-Pc treatment | Base        | C-Pc treatment |
| Temperature, °C         | 37.1 ± 0.2    | 37.1 ± 0.1     | 37.0 ± 0.1  | 37.1 ± 0.1     |
| pH                      | 7.7 ± 0.1     | 7.6 ± 0.1      | 7.6 ± 0.1   | 7.6 ± 0.1      |
| pO <sub>2</sub> , mmHg  | 146 ± 19.2    | 149.5 ± 7.3    | 150.2 ± 6.7 | 154.3 ± 13.0   |
| pCO <sub>2</sub> , mmHg | 40.3 ± 1.5    | 41.3 ± 1.4     | 39.1 ± 1.2  | 38.8 ± 0.6     |
| Glucose, mg/dL          | 109.8 ± 5.6   | 109.6 ± 2.2    | 109.6 ± 5.2 | 118.4 ± 2.4    |

Values are means SD (n=3). One way analysis of variance revealed no significant intergroup difference for any variance.

**Table S2.** Physiological parameters

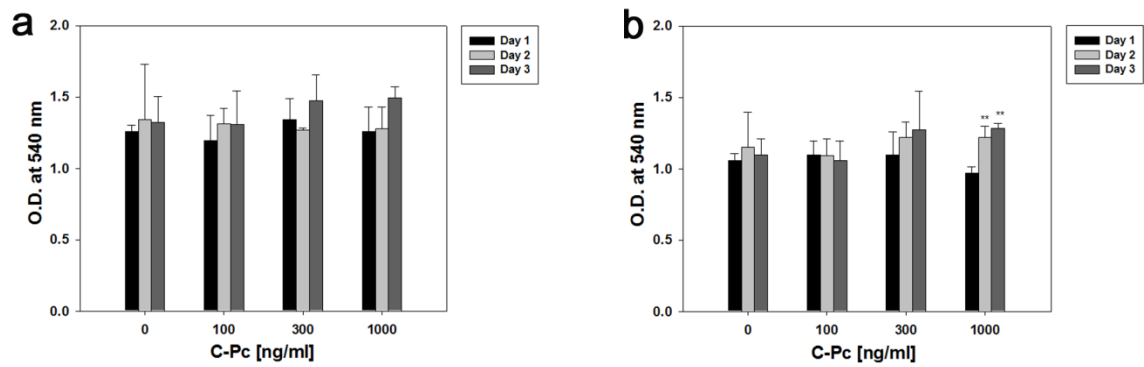

**Figure S1.** Effects of C-Pc on normal and oxidized Neuro2A. The C-Pc concentrations were 0, 100, 300, 1000, and 3000 ng/ml and the treatment times were 1, 2, and 3 day. (a) The viability of Neuro2A under normal condition was not changed with time and concentration of C-Pc. (b) The viability of Neuro2A under oxidative stress was also maintained and even upregulated by treatment of C-Pc. Data are presented as the means $\pm$ SEMs. \*  $p < 0.05$  and \*\*  $p < 0.01$  versus “day 1” at each concentration.

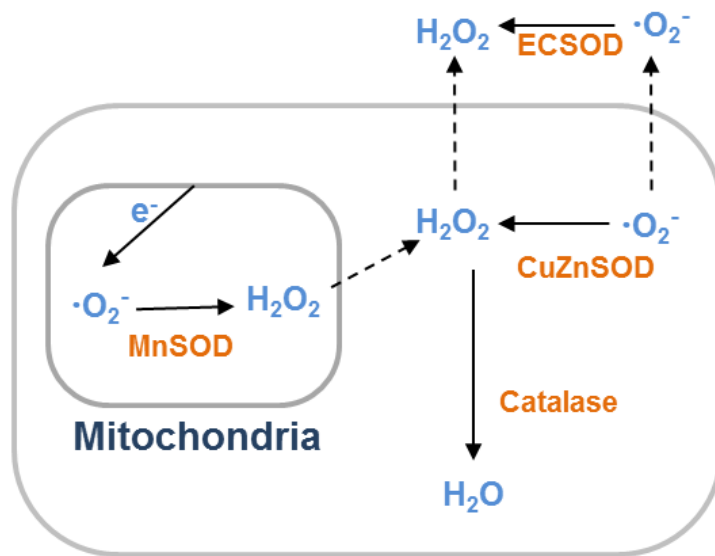

**Figure S2.** Typical antioxidant enzymes (MnSOD, CuZnSOD, EcSOD and Catalase) for removing ROS from the cells are marked in the metabolic pathway.

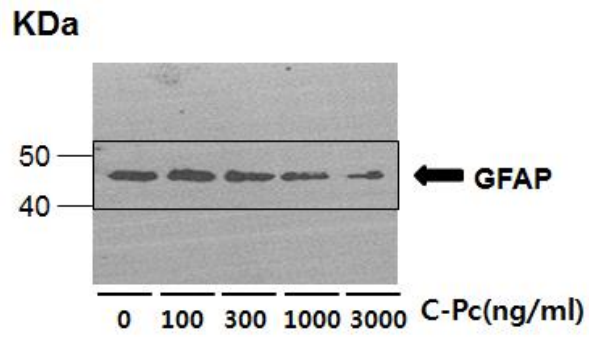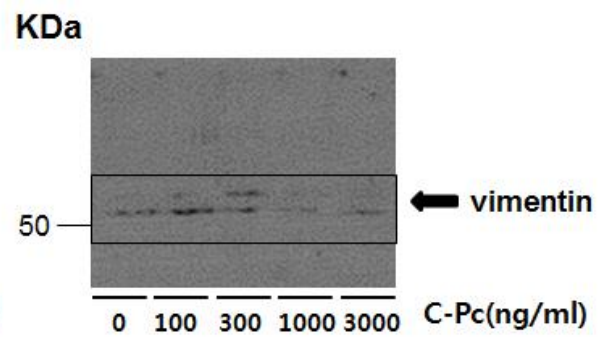

**Figure S3.** Full length blots of Fig. 4c

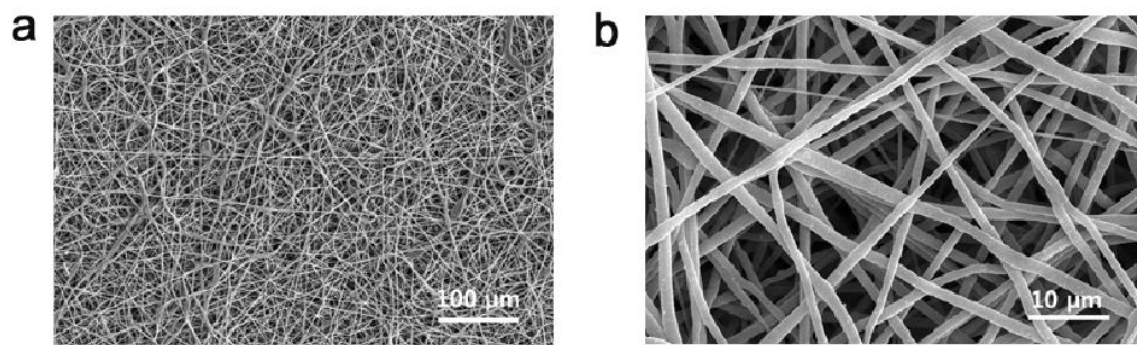

**Figure S4.** Fabricated electrospun nanofiber used for cell culture surface
